# Supplementary material for: Micro-CT Evaluation of Different Root Canal Irrigation Protocols on the Removal of Accumulated Hard Tissue Debris: A Systematic Review and Meta-Analysis
Source: MDPI journal article supplement (doi:10.3390/jcm11206053), 2022-10-13
Supplement: s1 [file s1]

**Supplementary Table S1.** Detailed searching strategy.

| Database       | Search String                                                                                                                                                                                                                                                                                                                                                                                                                                                                                                                                                                                                                                                                                                                                                                       |
|----------------|-------------------------------------------------------------------------------------------------------------------------------------------------------------------------------------------------------------------------------------------------------------------------------------------------------------------------------------------------------------------------------------------------------------------------------------------------------------------------------------------------------------------------------------------------------------------------------------------------------------------------------------------------------------------------------------------------------------------------------------------------------------------------------------|
| Pubmed         | <p>(((((root canal therapy[MeSH Terms]) OR (canal)) OR (endodontic)) AND (((((((micro ct, x ray[MeSH Terms]) ) OR (X Ray Microtomography)) OR (MicroCT)) OR (MicroCTs)) OR (Microcomputed Tomography)) OR (Tomography, Microcomputed)) OR (computed tomography))) AND (((((((therapeutic irrigation[MeSH Terms]) OR (irrigation)) OR (irrigations)) OR (Lavage)) OR (Lavages)) OR (Douching)) OR (Douchings))) AND (((((hard tissue debris) OR (ahtd)) OR (htd)) OR (debris)) OR (debridement))</p>                                                                                                                                                                                                                                                                                 |
| Web of Science | <p>(TS=(Canal) OR TS=(endodontic) ) AND (TS=(X Ray Microtomography) OR TS=(Microtomography, X-Ray) OR TS=(MicroCT) OR TS=(MicroCTs) OR TS=(Microcomputed Tomography) OR TS=(Tomography, Microcomputed) OR TS=(computed tomography)) AND (TS=(Therapeutic Irrigation) OR TS=(Irrigation, Therapeutic) OR TS=(irrigation) OR TS=(irrigations) OR TS=(Lavage) OR TS=(Lavages) OR TS=(Douching) OR TS=(Douchings)) AND (TS=(hard tissue debris) OR TS=(AHTD) OR TS=(HTD) OR TS=(debris) OR TS=(debridement))</p>                                                                                                                                                                                                                                                                        |
| Embase         | <p>('endodontic procedure'/exp OR 'canal' OR 'endodontic') AND ('micro-computed tomography'/exp OR 'micro-ct' OR 'microct' OR 'microcts' OR 'micro-cts' OR 'microcomputed tomography' OR 'micro computed tomography') AND ('lavage'/exp OR 'irrigation' OR 'irrigations' OR 'lavage' OR 'lavages' OR 'douching' OR 'douchings') AND ('dental surgery'/exp OR 'hard tissue debris' OR 'ahtd' OR 'htd' OR 'debris' OR 'debridement')</p> <p>#1 MeSH descriptor: [Root Canal Therapy] this term only</p> <p>#2 Canal or Endodontic</p> <p>#3 #1 or #2</p> <p>#4 MeSH descriptor: [Therapeutic Irrigation] this term only</p> <p>#5 Therapeutic Irrigation or Irrigation, Therapeutic or irrigation or irrigations or Lavage or Lavages or Douching or Douchings</p> <p>#6 #4 or #5</p> |
| Cochrane       | <p>#7 MeSH descriptor: [X-Ray Microtomography] this term only</p> <p>#8 micro-ct or micro-cts or microct or microcts or microcomputed tomography or micro computed tomography or micro-computed tomography</p> <p>#9 #7 or #8</p> <p>#10 MeSH descriptor: [Smear Layer] this term only</p> <p>#11 hard tissue debris or ahtd or htd or debris or debridement or gutta percha or guttapercha or gutta-percha or ultrafil or thermafil</p> <p>#12 #10 or #11</p> <p>#13 #3 and #6 and #9 and #12</p>                                                                                                                                                                                                                                                                                  |
| Scopus         | <p>(ALL (Canal OR endodontic) AND ALL ( irrigation OR irrigations OR lavage OR lavages OR douching OR douchings ) AND ALL ( micro-ct OR micro-cts OR microct OR microcts OR "microcomputed tomography" OR "micro computed tomography" OR "micro-computed tomography" ) AND ALL ( "hard tissue debris" OR ahtd OR htd OR debris OR debridement) )</p>                                                                                                                                                                                                                                                                                                                                                                                                                                |

Supplementary Table S2. Grading of the evidence.

| № of studies                         | Study design          | Risk of bias | Certainty assessment |              |                      |                      | № of patients  |         | Effect            |                                                       | Certainty        | Importance |
|--------------------------------------|-----------------------|--------------|----------------------|--------------|----------------------|----------------------|----------------|---------|-------------------|-------------------------------------------------------|------------------|------------|
|                                      |                       |              | Inconsistency        | Indirectness | Imprecision          | Other considerations | New Comparison | placebo | Relative (95% CI) | Absolute (95% CI)                                     |                  |            |
| SAI vs PUI                           |                       |              |                      |              |                      |                      |                |         |                   |                                                       |                  |            |
| 4                                    | observational studies | not serious  | not serious          | not serious  | not serious          | none                 | 47             | 47      | -                 | MD <b>6.01 lower</b> (22.68 lower to 10.66 higher)    | ⊕⊕○○<br>Low      | IMPORTANT  |
| SAI vs PUI - EA vs PUI               |                       |              |                      |              |                      |                      |                |         |                   |                                                       |                  |            |
| 2                                    | observational studies | not serious  | not serious          | not serious  | not serious          | none                 | 20             | 20      | -                 | MD <b>1.04 lower</b> (23.59 lower to 21.52 higher)    | ⊕⊕○○<br>Low      | IMPORTANT  |
| SAI vs PUI - EDDY vs PUI             |                       |              |                      |              |                      |                      |                |         |                   |                                                       |                  |            |
| 3                                    | observational studies | not serious  | not serious          | not serious  | not serious          | none                 | 27             | 27      | -                 | MD <b>9.06 lower</b> (35.2 lower to 17.08 higher)     | ⊕⊕○○<br>Low      | IMPORTANT  |
| Mechanical vs PUI                    |                       |              |                      |              |                      |                      |                |         |                   |                                                       |                  |            |
| 5                                    | observational studies | not serious  | not serious          | not serious  | serious <sup>a</sup> | none                 | 90             | 90      | -                 | MD <b>13.3 lower</b> (33.84 lower to 7.24 higher)     | ⊕○○○<br>Very low | IMPORTANT  |
| Mechanical vs PUI - XPF vs PUI       |                       |              |                      |              |                      |                      |                |         |                   |                                                       |                  |            |
| 4                                    | observational studies | not serious  | not serious          | not serious  | not serious          | none                 | 50             | 50      | -                 | MD <b>1.37 higher</b> (10.08 lower to 12.83 higher)   | ⊕⊕○○<br>Low      | IMPORTANT  |
| Mechanical vs PUI - EasyClean vs PUI |                       |              |                      |              |                      |                      |                |         |                   |                                                       |                  |            |
| 2                                    | observational studies | not serious  | not serious          | not serious  | serious <sup>a</sup> | none                 | 20             | 20      | -                 | MD <b>23.46 lower</b> (41.74 lower to 5.17 lower)     | ⊕○○○<br>Very low | IMPORTANT  |
| Mechanical vs PUI - SAF vs PUI       |                       |              |                      |              |                      |                      |                |         |                   |                                                       |                  |            |
| 2                                    | observational studies | not serious  | not serious          | not serious  | serious <sup>a</sup> | none                 | 20             | 20      | -                 | MD <b>52.61 lower</b> (59.75 lower to 45.48 lower)    | ⊕○○○<br>Very low | IMPORTANT  |
| LAI vs PUI                           |                       |              |                      |              |                      |                      |                |         |                   |                                                       |                  |            |
| 2                                    | observational studies | not serious  | not serious          | not serious  | serious <sup>a</sup> | none                 | 50             | 50      | -                 | MD <b>18.38 higher</b> (5.76 higher to 31 higher)     | ⊕○○○<br>Very low | IMPORTANT  |
| LAI vs PUI - PIPS vs PUI             |                       |              |                      |              |                      |                      |                |         |                   |                                                       |                  |            |
| 2                                    | observational studies | not serious  | not serious          | not serious  | serious <sup>a</sup> | none                 | 30             | 30      | -                 | MD <b>8.26 higher</b> (3.48 higher to 13.04 higher)   | ⊕○○○<br>Very low | IMPORTANT  |
| LAI vs PUI - SWEEPS vs PUI           |                       |              |                      |              |                      |                      |                |         |                   |                                                       |                  |            |
| 1                                    | observational studies | not serious  | not serious          | not serious  | not serious          | none                 | 20             | 20      | -                 | MD <b>33.45 higher</b> (28.96 higher to 37.93 higher) | ⊕⊕○○<br>Low      | IMPORTANT  |
| EV vs PUI                            |                       |              |                      |              |                      |                      |                |         |                   |                                                       |                  |            |
| 2                                    | observational studies | not serious  | not serious          | not serious  | serious              | none                 | 22             | 22      | -                 | MD <b>3.63 lower</b> (17.35 lower to 10.08 higher)    | ⊕○○○<br>Very low | IMPORTANT  |
| SNI vs PUI                           |                       |              |                      |              |                      |                      |                |         |                   |                                                       |                  |            |
| 5                                    | observational studies | not serious  | not serious          | not serious  | not serious          | none                 | 57             | 57      | -                 | MD <b>27.89 higher</b> (14.61 higher to 41.17 higher) | ⊕⊕○○<br>Low      | IMPORTANT  |

(CI: confidence interval; MD: mean difference; a. One study only report the volume of debris obtained before (A) and after (B) the final irrigation, the percentage debris reduction (red%) was calculated according to the following formula:  $\text{red\%} = 100 * (A - B) / A$ .
